# Supplementary material for: Preventing and De-escalating Aggressive Behavior Among Adult Psychiatric Patients: A Systematic Review of the Evidence
Source: Atypon-hosted journal article supplement (doi:10.1176/appi.ps.201600314), 2017-04-17
Supplement: appi.ps.201600314.ds001.pdf [file appi.ps.201600314.ds001.pdf]

**Figure 1. Summary of evidence search and selection of articles about strategies to prevent or de-escalate aggressive behavior**

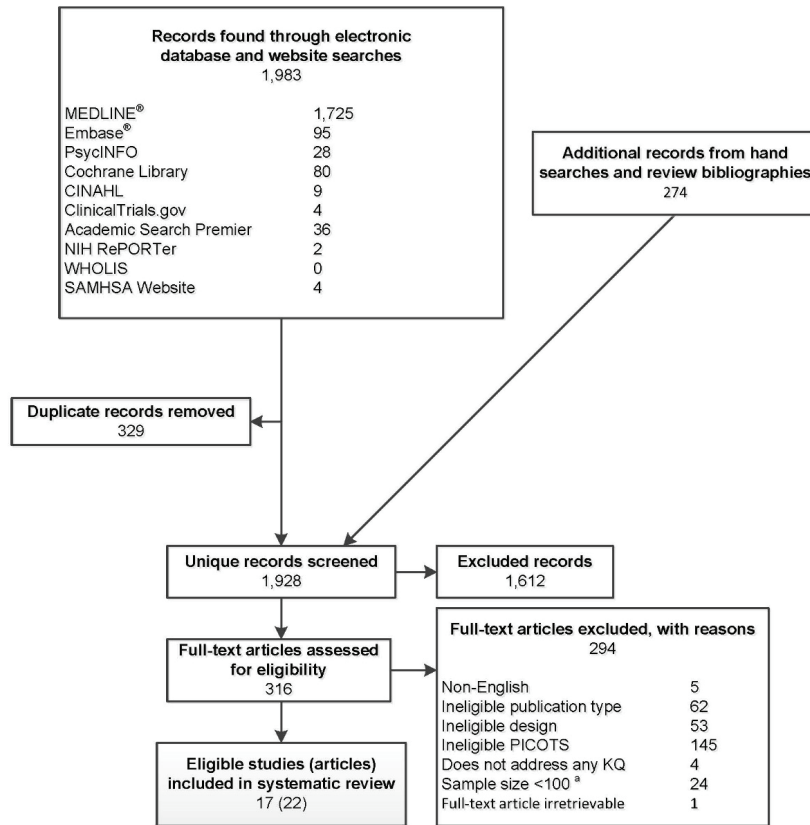

<sup>a</sup> This minimum sample size requirement only applies to nonrandomized studies.

CINAHL = Cumulative Index to Nursing and Allied Health Literature; KQ = Key Question; NIH RePORTer = National Institutes of Health Research Portfolio Online Reporting Tools; PICOTS = Populations-Interventions-Comparators-Outcomes-Time Frames-Settings; SAMHSA = Substance Abuse and Mental Health Services Administration; WHOLIS = World Health Organization's Library Database

**Online Supplement Table 1. Eligibility criteria for review of strategies to de-escalate aggressive behavior**

| <b>PICOTS</b> | <b>Inclusion</b>                                                                                                                                                                                                                                                                                                                                                                                                                                                                                                                                                                                                                                                                                                                                                                                                                                                                                                                                                                                                          | <b>Exclusion</b>                                                                                                                                                                                                                      |
|---------------|---------------------------------------------------------------------------------------------------------------------------------------------------------------------------------------------------------------------------------------------------------------------------------------------------------------------------------------------------------------------------------------------------------------------------------------------------------------------------------------------------------------------------------------------------------------------------------------------------------------------------------------------------------------------------------------------------------------------------------------------------------------------------------------------------------------------------------------------------------------------------------------------------------------------------------------------------------------------------------------------------------------------------|---------------------------------------------------------------------------------------------------------------------------------------------------------------------------------------------------------------------------------------|
| Populations   | <p>KQs 1 through 3:</p> <ul style="list-style-type: none"> <li>Adult individuals (ages 18 or older) with an identified psychiatric disorder (if in an inpatient setting), including substance use disorders and delirium (but not dementia), or with severe psychiatric symptomatology (if in an emergency department setting where a formal psychiatric diagnosis often is not made), who are at risk of or actively exhibiting aggressive behavior toward self, others, or property.</li> </ul>                                                                                                                                                                                                                                                                                                                                                                                                                                                                                                                         | All other populations                                                                                                                                                                                                                 |
| Interventions | <p>KQs 1a and 2a:</p> <ul style="list-style-type: none"> <li>Strategies (early intervention techniques) targeted to reduce the likelihood of aggressive behavior (examples provided in the PICOTS criteria)</li> </ul> <p>KQs 1b/1c and 2b/2c:</p> <ul style="list-style-type: none"> <li>Strategies targeted to decrease aggression for those who are actively aggressive (examples provided in the PICOTS criteria)</li> </ul> <p>KQ 3: Same as KQs 1 and 2</p>                                                                                                                                                                                                                                                                                                                                                                                                                                                                                                                                                         | <p>All other interventions</p> <ul style="list-style-type: none"> <li>For medication-based interventions, those that are not FDA-approved for any indication</li> </ul>                                                               |
| Comparators   | <p>KQs 1a and 2a:</p> <ul style="list-style-type: none"> <li>Other strategies (early intervention techniques), but not seclusion and restraints, targeted to reduce the likelihood of aggressive behavior, as described above for KQs 1a and 2a</li> <li>Usual care, defined as the standard of care for a particular setting before implementation of an intervention designed to decrease the likelihood of aggression and/or the use of seclusion and restraint</li> </ul> <p>KQs 1b/1c and 2b/2c:</p> <ul style="list-style-type: none"> <li>Other strategies targeted to decrease aggression for those who are actively aggressive, as described above for KQs 1b/1c and 2b/2c</li> <li>Seclusion or restraint (for 1b and 2b only) (as defined in the PICOTS criteria)</li> <li>Usual care, defined as the standard of care for a particular setting before implementation of an intervention designed to decrease aggression and/or the use of seclusion and restraint</li> </ul> <p>KQ 3: Same as KQs 1 and 2</p> | <p>All KQs:</p> <ul style="list-style-type: none"> <li>A study with no comparison group</li> <li>For medication-based strategies, placebo-only comparisons and those comparing different doses or routes of administration</li> </ul> |
| Outcomes      | <p>KQs 1a, 1b, and 1c:</p> <ul style="list-style-type: none"> <li>Intermediate outcomes: <ul style="list-style-type: none"> <li>Primary outcomes: <ul style="list-style-type: none"> <li>Decreased aggression in terms of frequency, severity, or duration (as measured by direct counts or by validated aggression scales)</li> <li><u>KQs 1a and 1c only</u>: Reduced use of seclusion or restraints (decreased rate, amount, or duration)</li> <li>To be eligible, each study must have reported on at least one of the outcomes above</li> </ul> </li> <li>Secondary outcomes: <ul style="list-style-type: none"> <li>As defined in the PICOTS criteria</li> </ul> </li> </ul> </li> <li>Final health outcomes: <ul style="list-style-type: none"> <li>As defined in the PICOTS criteria</li> </ul> </li> </ul> <p>KQs 2a, 2b, and 2c: As defined in the PICOTS criteria</p> <p>KQ 3: Same as KQs 1 and 2</p>                                                                                                         | None                                                                                                                                                                                                                                  |

**Online Supplement Table 1. Eligibility criteria for review of strategies to de-escalate aggressive behavior (continued)**

| <b>PICOTS</b>        | <b>Inclusion</b>                                                                                                                                                                                                                                                                                                                                                                                                                                                                                                                                                                                            | <b>Exclusion</b>                                                                                                                                                                                     |
|----------------------|-------------------------------------------------------------------------------------------------------------------------------------------------------------------------------------------------------------------------------------------------------------------------------------------------------------------------------------------------------------------------------------------------------------------------------------------------------------------------------------------------------------------------------------------------------------------------------------------------------------|------------------------------------------------------------------------------------------------------------------------------------------------------------------------------------------------------|
| Timing               | All KQs: Imminently or within current episode of care (e.g., inpatient hospitalization, emergency department stay)                                                                                                                                                                                                                                                                                                                                                                                                                                                                                          | All KQs: Outside current episode of care                                                                                                                                                             |
| Settings             | All KQs: Acute care settings, including emergency department or hospital (e.g., private or public psychiatric hospitals, general medical hospitals at which discharge occurs within 35 days of beginning treatment) <sup>a</sup>                                                                                                                                                                                                                                                                                                                                                                            | All KQs: Outpatient, community-based, jails, prisons, schools, chronic care, forensic-only, <sup>b</sup> or long-term care settings                                                                  |
| Study designs        | All KQs: <ul style="list-style-type: none"> <li>• Systematic reviews, with or without meta-analyses</li> <li>• Randomized controlled trials</li> <li>• Nonrandomized controlled trials</li> <li>• Cohorts (prospective and retrospective)</li> <li>• Case-control studies</li> <li>• Single group pre/post studies (including pre/post studies with &lt;3 pre- and &lt;3 post-intervention time points)<sup>c, d</sup></li> <li>• Interrupted time-series designs (i.e., time-series studies with ≥3 pre-intervention and ≥3 post-intervention measurements with one or more groups)<sup>c</sup></li> </ul> | All KQs: <ul style="list-style-type: none"> <li>• Case studies or series</li> <li>• Cross-sectional studies</li> <li>• Studies without a comparison group</li> <li>• Nonsystematic review</li> </ul> |
| Publications         | All KQs: Original research                                                                                                                                                                                                                                                                                                                                                                                                                                                                                                                                                                                  | All KQs: Not original research (e.g., editorials without original data, newspaper articles)                                                                                                          |
| Geographic locations | Developed countries (“very high” human development index per the United Nations Development Programme <sup>1</sup> )                                                                                                                                                                                                                                                                                                                                                                                                                                                                                        | All other countries                                                                                                                                                                                  |
| Language             | English                                                                                                                                                                                                                                                                                                                                                                                                                                                                                                                                                                                                     | All other languages                                                                                                                                                                                  |

<sup>a</sup> Studies of settings that treated patients receiving both acute and chronic care were excluded. To be clear, a single unit or wing of a hospital could be eligible if inpatient stays were 35 days or less, even if other sections of the larger hospital provided longer-term care. We assumed that studies describing their sample’s inpatient clinical services as “acute care” referred to discharge within 35 days of admission, when no specific information about lengths of stay was available. We attempted to locate information about the types of care provided in study-specific settings if there was concern that study analyses may have included a mixture of acute-care and chronic-care patients. When no information was available to confirm that a study’s inpatient clinical services were acute care or that lengths of inpatient stays were 35 days or less, we excluded it.

<sup>b</sup> We excluded studies focusing only on forensic units or hospitals, but studies conducted in acute care settings were eligible if their samples included both forensic and nonforensic patients.

<sup>c</sup> A “group” could indicate a group of patients, acute care unit, or hospital evaluated before and after implementation of an intervention.

<sup>d</sup> We considered time-series studies with 2 pre-intervention and/or 2 post-intervention measurements as pre/post studies.

FDA = U.S. Food and Drug Administration; KQ = Key Question; PICOTS = populations, interventions, comparators, outcomes, timing, and settings.

## References

1. United Nations Development Programme (UNDP). Human Development Report 2014 - Sustaining Human Progress: Reducing Vulnerabilities and Building Resilience. United Nations Development Programme; 2014 <http://hdr.undp.org/en/2014-report>.

**Online Supplement Table 2. Key characteristics of studies of interventions to de-escalate aggressive behaviors in acute care settings (including psychiatric diagnoses and sociodemographic characteristics), by intervention category**

| <b>Author, Year<br/>Study Design, Risk of<br/>Bias<br/>Clinical Setting,<br/>Country</b>                                  | <b>N of Patients<sup>a</sup><br/><br/>Duration of<br/>Intervention(s)</b> | <b>Intervention(s) and<br/>Comparator(s) (n of<br/>patients, if reported)</b>                                                                                      | <b>Summary Description of<br/>Patient Population</b>                                                                                | <b>Percent with Psychiatric<br/>Diagnoses</b>                                                                                                                                                                                                                                                                                | <b>Age: Mean (SD)<br/><br/>Percent Female<br/><br/>Percent Non-<br/>White</b>                                            |
|---------------------------------------------------------------------------------------------------------------------------|---------------------------------------------------------------------------|--------------------------------------------------------------------------------------------------------------------------------------------------------------------|-------------------------------------------------------------------------------------------------------------------------------------|------------------------------------------------------------------------------------------------------------------------------------------------------------------------------------------------------------------------------------------------------------------------------------------------------------------------------|--------------------------------------------------------------------------------------------------------------------------|
| <b><i>Staff Training Interventions</i></b>                                                                                |                                                                           |                                                                                                                                                                    |                                                                                                                                     |                                                                                                                                                                                                                                                                                                                              |                                                                                                                          |
| Kontio et al., 2014 <sup>1</sup><br>CRT, High<br>Psychiatric hospitals (8<br>units), Finland                              | NR<br>2 years                                                             | G1: Online eLearning<br>course for unit nurses on<br>managing aggression or<br>violence and preventing<br>coercion<br>G2: Education as usual                       | Inpatients on acute, closed<br>units that practice<br>seclusion or restraint                                                        | NR                                                                                                                                                                                                                                                                                                                           | NR                                                                                                                       |
| Smoot et al., 1995 <sup>2</sup><br>CRT, High<br>Inpatient psychiatric<br>recidivist units <sup>c</sup> ,<br>United States | NR <sup>b</sup><br>6 months                                               | G1: Empathic<br>interpersonal<br>communication training<br>program for hospital staff<br>G2: Usual care                                                            | Primary diagnosis of<br>mental illness for patients<br>who had returned to the<br>hospital within 1 year of a<br>previous discharge | NR                                                                                                                                                                                                                                                                                                                           | NR                                                                                                                       |
| <b><i>Risk Assessment Interventions</i></b>                                                                               |                                                                           |                                                                                                                                                                    |                                                                                                                                     |                                                                                                                                                                                                                                                                                                                              |                                                                                                                          |
| Abderhalden et al.,<br>2008 <sup>3</sup><br>CRT, Medium<br>Psychiatric inpatient<br>treatment facilities,<br>Switzerland  | 973 <sup>d</sup><br>3 months                                              | G1: Structured risk<br>assessment (BVC) for<br>every new patient twice a<br>day during the first 3<br>days of hospitalization<br>(n=390)<br>G2: Usual care (n=583) | Inpatients, most with an<br>acute psychiatric disorder                                                                              | Schizophrenia, schizotypal<br>and delusional disorders<br>G1: 33.4<br>G2: 35.7<br><br>Disorders due to<br>psychoactive substance<br>use<br>G1: 26.2<br>G2: 24.2<br><br>Mood (affective) disorders<br>G1: 15.5<br>G2: 15.3<br><br>Neurotic, stress-related<br>and somatoform<br>disorders, behavioral<br>syndromes associated | Age<br>G1: 39.0 (13.1)<br>G2: 38.0 (14.3)<br><br>Percent female<br>G1: 45.6<br>G2: 44.8<br><br>Percent non-<br>white: NR |

| Author, Year<br>Study Design, Risk of<br>Bias<br>Clinical Setting,<br>Country                       | N of Patients <sup>a</sup><br><br>Duration of<br>Intervention(s) | Intervention(s) and<br>Comparator(s) (n of<br>patients, if reported)                                                                                                                                                                                                               | Summary Description of<br>Patient Population                                                                                    | Percent with Psychiatric<br>Diagnoses                                                                                                                                                                 | Age: Mean (SD)<br><br>Percent Female<br><br>Percent Non-<br>White                                                             |
|-----------------------------------------------------------------------------------------------------|------------------------------------------------------------------|------------------------------------------------------------------------------------------------------------------------------------------------------------------------------------------------------------------------------------------------------------------------------------|---------------------------------------------------------------------------------------------------------------------------------|-------------------------------------------------------------------------------------------------------------------------------------------------------------------------------------------------------|-------------------------------------------------------------------------------------------------------------------------------|
|                                                                                                     |                                                                  |                                                                                                                                                                                                                                                                                    |                                                                                                                                 | with physiological<br>disturbances and physical<br>factors<br>G1: 14.3<br>G2: 11.5<br><br>Other/missing<br>G1: 10.6<br>G2: 13.3                                                                       |                                                                                                                               |
| van de Sande et al.,<br>2011 <sup>4</sup><br>CRT, Medium<br>Acute psychiatric units,<br>Netherlands | 458<br>30 weeks                                                  | G1: Structured risk<br>assessment (n=207):<br>Daily (5 mins) using BVC<br>and Kennedy-Axis V<br>(short version);<br>Weekly (15 mins) using<br>Kennedy-Axis V (full<br>version), BPRS,<br>Dangerousness Scale,<br>and the SDAS<br>G2: Usual care /<br>Treatment as usual<br>(n=251) | Patients admitted to acute<br>psychiatric units, mostly<br>with psychotic disorders<br>(74%) and personality<br>disorders (25%) | Patients admitted to acute<br>psychiatric units<br><br>Psychotic disorder<br>G1: 74<br>G2: 57<br><br>Personality disorders<br>G1: 25<br>G2: 6<br><br>Drug misuse first<br>diagnosis<br>G1: 4<br>G2: 3 | Age (SD)<br>G1: 38 (13)<br>G2: 40 (11)<br><br>Percent female<br>G1: 47<br>G2: 46<br><br>Percent non-white<br>G1: 31<br>G2: 16 |
| <b>Multimodal Interventions</b>                                                                     |                                                                  |                                                                                                                                                                                                                                                                                    |                                                                                                                                 |                                                                                                                                                                                                       |                                                                                                                               |
| Putkonen et al., 2013 <sup>5</sup><br>CRT, Medium<br>Public psychiatric<br>hospital, Finland        | NR <sup>e</sup><br>6 months                                      | G1: Six Core Strategies<br>implementation (best<br>practices to reduce use<br>of seclusion and<br>restraints)<br>G2: Usual care /<br>Treatment as usual                                                                                                                            | Male inpatients in high-<br>security units who had<br>psychotic illness and a<br>history of violence                            | Schizophrenia: 100                                                                                                                                                                                    | Age<br>G1: 40.2 (10.6)<br>G2: 38.4 (10.6)<br><br>Percent female: 0<br><br>Percent non-<br>white: NR                           |
| <b>Environmental or Group Psychotherapeutic Interventions</b>                                       |                                                                  |                                                                                                                                                                                                                                                                                    |                                                                                                                                 |                                                                                                                                                                                                       |                                                                                                                               |

| Author, Year<br>Study Design, Risk of<br>Bias<br>Clinical Setting,<br>Country                                               | N of Patients <sup>a</sup><br><br>Duration of<br>Intervention(s) | Intervention(s) and<br>Comparator(s) (n of<br>patients, if reported)                                                                                                                                  | Summary Description of<br>Patient Population                                                                                                          | Percent with Psychiatric<br>Diagnoses                                                                                                                                               | Age: Mean (SD)                                                                                                                                                                                 |                       |
|-----------------------------------------------------------------------------------------------------------------------------|------------------------------------------------------------------|-------------------------------------------------------------------------------------------------------------------------------------------------------------------------------------------------------|-------------------------------------------------------------------------------------------------------------------------------------------------------|-------------------------------------------------------------------------------------------------------------------------------------------------------------------------------------|------------------------------------------------------------------------------------------------------------------------------------------------------------------------------------------------|-----------------------|
|                                                                                                                             |                                                                  |                                                                                                                                                                                                       |                                                                                                                                                       |                                                                                                                                                                                     | Percent Female                                                                                                                                                                                 | Percent Non-<br>White |
| Nurenberg et al., 2015 <sup>6</sup><br>RCT, Medium<br>State psychiatric<br>hospital,<br>United States                       | 90<br><br>3 months                                               | G1: Equine-assisted<br>psychotherapy (n=24)<br>G2: Canine-assisted<br>psychotherapy (n=25)<br>G3: Environmentally<br>enhanced social skills<br>group psychotherapy<br>(n=23)<br>G4: Usual care (n=18) | Inpatients with "aggressive<br>or regressed behavior" or<br>"persistent social isolation"<br>and difficulty engaging in<br>discharge-related programs | Schizophrenia<br>G1: 29<br>G2: 32<br>G3: 35<br>G4: 39<br><br>Schizoaffective<br>G1: 38<br>G2: 56<br>G3: 43<br>G4: 28<br><br>Affective/Other<br>G1: 33<br>G2: 12<br>G3: 22<br>G4: 33 | Age<br>G1: 44.3 (13.8)<br>G2: 45.0 (10.8)<br>G3: 43.2 (10.3)<br>G4: 44.4 (11.9)<br><br>Female<br>G1: 25<br>G2: 44<br>G3: 43<br>G4: 33<br><br>Non-White<br>G1: 38<br>G2: 32<br>G3: 43<br>G4: 45 |                       |
| Carlson et al., 1993 <sup>7</sup><br>Retrospective cohort<br>study, High<br>State psychiatric<br>hospital,<br>United States | 120<br><br>90 days                                               | G1: Occupational therapy<br>at least 1 time every 30<br>days (n=60)<br>G2: No occupational<br>therapy in at least 1 of<br>the 3 30-day periods<br>(n=60)                                              | Patients with at least a 90-<br>day inpatient stay on<br>psychiatric unit; only data<br>from first 90 days of stay<br>were included                   | Schizoaffective disorder<br>G1: 16.7<br>G2: 21.7<br><br>Schizophrenia, paranoid<br>type, chronic<br>G1: 16.7<br>G2: 18.4                                                            | Age<br>G1: 47.6 (18.3)<br>G2: 45.5 (15.8)<br><br>Female<br>G1: 52<br>G2: 48<br><br>Non-White<br>G1: 19<br>G2: 15                                                                               |                       |
| <b>Medication Protocols</b>                                                                                                 |                                                                  |                                                                                                                                                                                                       |                                                                                                                                                       |                                                                                                                                                                                     |                                                                                                                                                                                                |                       |
| Bieniek et al., 1998 <sup>8</sup><br>RCT, Low<br>Psychiatric emergency<br>service (in-hospital),<br>United States           | 20<br><br>3 hours                                                | G1: Haloperidol, 5 mg<br>i.m. plus lorazepam 2 mg<br>i.m. (n=9)<br>G2: Lorazepam, 2 mg<br>i.m. (n=11)                                                                                                 | Patients with serious,<br>acutely agitated or<br>aggressive behavior and<br>who met clinical criteria for<br>use of chemical restraints               | Bipolar disorder, manic<br>G1: 33.3<br>G2: 54.5<br><br>Psychosis NOS                                                                                                                | Age<br>Overall (mean,<br>SD): 36.3 (8.1)<br>G1 (median): 41.0<br>G2 (median): 35.0                                                                                                             |                       |

| Author, Year<br>Study Design, Risk of<br>Bias<br>Clinical Setting,<br>Country             | N of Patients <sup>a</sup><br><br>Duration of<br>Intervention(s) | Intervention(s) and<br>Comparator(s) (n of<br>patients, if reported)                                                                    | Summary Description of<br>Patient Population                                                                                                       | Age: Mean (SD)                                                                                                      |                                                                                                     |
|-------------------------------------------------------------------------------------------|------------------------------------------------------------------|-----------------------------------------------------------------------------------------------------------------------------------------|----------------------------------------------------------------------------------------------------------------------------------------------------|---------------------------------------------------------------------------------------------------------------------|-----------------------------------------------------------------------------------------------------|
|                                                                                           |                                                                  |                                                                                                                                         |                                                                                                                                                    | Percent with Psychiatric<br>Diagnoses                                                                               | Percent Female<br><br>Percent Non-<br>White                                                         |
|                                                                                           |                                                                  |                                                                                                                                         |                                                                                                                                                    | G1: 22.2<br>G2: 18.2                                                                                                | Female<br>G1: 44.4<br>G2: 27.3                                                                      |
|                                                                                           |                                                                  |                                                                                                                                         | Schizophrenia, paranoid                                                                                                                            | G1: 11.1<br>G2: 18.2                                                                                                | Hispanic<br>G1: 33.3<br>G2: 18.2                                                                    |
|                                                                                           |                                                                  |                                                                                                                                         | Brief reactive psychosis                                                                                                                           | G1: 11.1<br>G2: 0                                                                                                   | African-American<br>G1: 33.3<br>G2: 54.5                                                            |
|                                                                                           |                                                                  |                                                                                                                                         | Schizophrenia,<br>undifferentiated                                                                                                                 | G1: 11.1<br>G2: 0                                                                                                   | Haitian<br>G1: 0<br>G2: 9.1                                                                         |
|                                                                                           |                                                                  |                                                                                                                                         | Substance-induced                                                                                                                                  | G1: 11.1<br>G2: 9.1                                                                                                 |                                                                                                     |
| Dorevitch et al., 1999 <sup>9</sup><br>RCT, Medium<br>Psychiatric hospital,<br>Israel     | 28<br>90 minutes                                                 | During aggressive event:<br>G1: Haloperidol, 5 mg<br>i.m. (n=13)<br>G2: Flunitrazepam, 1 mg<br>i.m. (n=15)                              | Acute unit patients with<br>active psychosis, disruptive<br>or aggressive behavior,<br>pronounced psychomotor<br>agitation or violent<br>outbursts | Schizophrenia &<br>schizoaffective disorder<br>G1: 92.3<br>G2: 93.3<br><br>Bipolar I disorder<br>G1: 7.7<br>G2: 6.7 | Age<br>G1: 36.8 (15.1)<br>G2: 34.9 (8.1)<br><br>Female<br>G1: 61.5<br>G2: 46.7<br><br>Non-white: NR |
| Georgieva et al., 2013 <sup>10</sup><br>RCT, High<br>Psychiatric hospital,<br>Netherlands | 520 (with 659<br>admissions)<br>144 weeks                        | Intervention of first choice<br>for agitation and risk of<br>violence:<br>G1: Involuntary<br>medication (n=236, with<br>306 admissions) | Patients admitted to acute<br>units, most with either<br>addiction or a psychotic,<br>mood, personality, or post-<br>traumatic stress disorder     | Psychotic disorder<br>G1: 20<br>G2: 20<br><br>Mood disorder<br>G1: 31                                               | Age<br>G1: 40 (13)<br>G2: 40 (12)<br><br>Female<br>G1: 52                                           |



| Author, Year<br>Study Design, Risk of<br>Bias<br>Clinical Setting,<br>Country                   | N of Patients <sup>a</sup><br><br>Duration of<br>Intervention(s) | Intervention(s) and<br>Comparator(s) (n of<br>patients, if reported)                                                                            | Summary Description of<br>Patient Population                                                                                                                                   | Percent with Psychiatric<br>Diagnoses                                                                                                                                                                                                 | Age: Mean (SD)                                                                                                                                       |
|-------------------------------------------------------------------------------------------------|------------------------------------------------------------------|-------------------------------------------------------------------------------------------------------------------------------------------------|--------------------------------------------------------------------------------------------------------------------------------------------------------------------------------|---------------------------------------------------------------------------------------------------------------------------------------------------------------------------------------------------------------------------------------|------------------------------------------------------------------------------------------------------------------------------------------------------|
|                                                                                                 |                                                                  |                                                                                                                                                 |                                                                                                                                                                                |                                                                                                                                                                                                                                       | Percent Female<br><br>Percent Non-<br>White                                                                                                          |
|                                                                                                 |                                                                  | G2: Seclusion (n=284,<br>with 353 admissions)                                                                                                   |                                                                                                                                                                                | G2: 32<br><br>Personality disorder<br>G1: 24<br>G2: 23<br><br>Addiction<br>G1: 31<br>G2: 32<br><br>PTSD<br>G1: 5<br>G2: 8                                                                                                             | G2: 47<br><br>Non-Dutch<br>ethnicity<br>G1: 17<br>G2: 18                                                                                             |
| Isbister et al., 2010 <sup>11</sup><br>RCT, Medium<br>Public psychiatric<br>hospital, Australia | 91<br>6 hours                                                    | G1: Droperidol, 10 mg<br>i.m. (n=33)<br>G2: Midazolam, 10 mg<br>i.m. (n=29)<br>G3: Droperidol, 5 mg i.m.<br>plus midazolam, 5 mg<br>i.m. (n=29) | Patients presenting to the<br>emergency department<br>with violence and acute<br>behavioral disturbance and<br>requiring both physical<br>restraint and parenteral<br>sedation | Alcohol intoxication<br>G1: 70<br>G2: 76<br>G3: 66<br><br>Deliberate self-harm<br>G1: 48<br>G2: 41<br>G3: 45<br><br>Drug-induced delirium<br>G1: 6<br>G2: 10<br>G3: 10<br><br>Acute psychosis<br>G1: 6<br>G2: 3<br>G3: 6<br><br>Other | Age, mean<br>(range)<br>G1: 37 (25 to 45)<br>G2: 35 (27 to 43)<br>G3: 30 (22 to 40)<br><br>Female<br>G1: 64<br>G2: 38<br>G3: 48<br><br>Non-white: NR |

| Author, Year<br>Study Design, Risk of<br>Bias<br>Clinical Setting,<br>Country                                                 | N of Patients <sup>a</sup><br><br>Duration of<br>Intervention(s) | Intervention(s) and<br>Comparator(s) (n of<br>patients, if reported)                                                              | Summary Description of<br>Patient Population                                                                                                                          | Percent with Psychiatric<br>Diagnoses                                                                             | Age: Mean (SD)                                                                                                                                                                                                                                               |                       |
|-------------------------------------------------------------------------------------------------------------------------------|------------------------------------------------------------------|-----------------------------------------------------------------------------------------------------------------------------------|-----------------------------------------------------------------------------------------------------------------------------------------------------------------------|-------------------------------------------------------------------------------------------------------------------|--------------------------------------------------------------------------------------------------------------------------------------------------------------------------------------------------------------------------------------------------------------|-----------------------|
|                                                                                                                               |                                                                  |                                                                                                                                   |                                                                                                                                                                       |                                                                                                                   | Percent Female                                                                                                                                                                                                                                               | Percent Non-<br>White |
|                                                                                                                               |                                                                  |                                                                                                                                   |                                                                                                                                                                       | G1: 3<br>G2: 0<br>G3: 3                                                                                           |                                                                                                                                                                                                                                                              |                       |
| Krakowski et al.,<br>2006 <sup>12, 13</sup><br>RCT, Medium<br>State psychiatric<br>facilities (in-hospital),<br>United States | 110<br>12 weeks                                                  | G1: Clozapine, oral 500<br>mg/day (n=37)<br>G2: Olanzapine, oral 20<br>mg/day (n=37)<br>G3: Haloperidol, oral 20<br>mg/day (n=36) | Patients with confirmed<br>episode of physical assault<br>directed at another person<br>during their current<br>hospitalization and some<br>persistence of aggression | Schizophrenia<br>G1: 73<br>G2: 62.2<br>G3: 58.3<br><br>Schizoaffective disorder<br>G1: 27<br>G2: 37.8<br>G3: 41.7 | Age<br>G1: 35.1 (12.3)<br>G2: 35.6 (9.4)<br>G3: 32.7 (10.6)<br><br>Female<br>G1: 16.2<br>G2: 21.6<br>G3: 16.7<br><br>Black<br>G1: 54.1<br>G2: 75.7<br>G3: 58.3<br><br>Hispanic<br>G1: 21.6<br>G2: 10.8<br>G3: 22.2<br><br>Other<br>G1: 5.4<br>G2: 0<br>G3: 0 |                       |
| Michaud et al., 2014 <sup>14</sup><br>Retrospective cohort<br>study, High<br>Public psychiatric<br>hospital, U.S.             | 200<br>24 hours                                                  | G1: Delirium treatment<br>within 24 hours (n=102)<br>G2: No delirium<br>treatment, or treatment<br>after 24 hours (n=98)          | Adults in an intensive care<br>unit with a documented<br>positive delirium screen at<br>time of mechanical<br>ventilation                                             | NR                                                                                                                | Age<br>G1: 58 (17)<br>G2: 62 (15)<br><br>Female<br>G1: 53<br>G2: 53                                                                                                                                                                                          |                       |

| Author, Year<br>Study Design, Risk of<br>Bias<br>Clinical Setting,<br>Country                                        | N of Patients <sup>a</sup><br><br>Duration of<br>Intervention(s) | Intervention(s) and<br>Comparator(s) (n of<br>patients, if reported)                                                                                                                         | Summary Description of<br>Patient Population                                                                                                                                      | Percent with Psychiatric<br>Diagnoses                                                                                                                                                               | Age: Mean (SD)<br><br>Percent Female<br><br>Percent Non-<br>White                                                                                                                                                        |
|----------------------------------------------------------------------------------------------------------------------|------------------------------------------------------------------|----------------------------------------------------------------------------------------------------------------------------------------------------------------------------------------------|-----------------------------------------------------------------------------------------------------------------------------------------------------------------------------------|-----------------------------------------------------------------------------------------------------------------------------------------------------------------------------------------------------|--------------------------------------------------------------------------------------------------------------------------------------------------------------------------------------------------------------------------|
| Richards et al., 1998 <sup>15</sup><br>RCT, High<br>Large urban university<br>emergency department,<br>United States | 202<br>60 minutes                                                | G1: Droperidol, 2.5-5 mg<br>i.v. <sup>f</sup> (n=102)<br>G2: Lorazepam, 2-4 mg<br>i.v. <sup>f</sup> (n=100)                                                                                  | Acutely agitated patients<br>with violent, controlled, or<br>uncontrolled muscular<br>movement placing<br>themselves and staff at<br>danger and requiring<br>constant supervision | NR, but toxicology tests<br>positive for following<br>substances:<br><br>Methamphetamine<br>G1: 70.6<br>G2: 74.0<br><br>Cocaine<br>G1: 15.7<br>G2: 12.0<br><br>Ethanol<br>G1: 49.0<br>G2: 48.0      | Non-white: NR<br><br>Age<br>Overall: 33.9<br>(10.5)<br>G1: 33.2 (10.2)<br>G2: 34.6 (10.8)<br><br>Percent female<br>Overall: 38.1<br>G1: 39.2<br>G2: 37.0<br><br>Percent non-white<br>Overall: 30.7<br>G1: 31.4<br>G2: 30 |
| Villari et al., 2008 <sup>16</sup><br>NRCT, Medium<br>Psychiatric emergency<br>service (in-hospital),<br>Italy       | 101<br>72 hours                                                  | G1: Risperidone, oral 2-6<br>mg/day (n=27)<br>G2: Olanzapine, oral 10-<br>20 mg/day (n=24)<br>G3: Quetiapine, oral 300-<br>800 mg/day (n=22)<br>G4: Haloperidol, oral 5-<br>15 mg/day (n=28) | Psychotic inpatients<br>requiring emergency<br>medication for control of<br>agitation                                                                                             | Schizophrenia<br>G1: 30<br>G2: 46<br>G3: 32<br>G4: 40<br><br>Schizoaffective disorder<br>G1: 7<br>G2: 0<br>G3: 27<br>G4: 11<br><br>Brief psychotic disorder<br>G1: 48<br>G2: 16<br>G3: 18<br>G4: 32 | Age<br>G1: 39.2 (12.7)<br>G2: 41.5 (12.2)<br>G3: 41.2 (15.2)<br>G4: 39.8 (9.0)<br><br>Female<br>G1: 44.4<br>G2: 37.5<br>G3: 59.1<br>G4: 39.3<br><br>Percent non-<br>white: NR                                            |

| Author, Year<br>Study Design, Risk of<br>Bias<br>Clinical Setting,<br>Country                                | N of Patients <sup>a</sup><br><br>Duration of<br>Intervention(s) | Intervention(s) and<br>Comparator(s) (n of<br>patients, if reported)                                                                                                                                                                                                                                                                                                       | Summary Description of<br>Patient Population                                                                                                                                                                            | Percent with Psychiatric<br>Diagnoses                                                                                                                                                                                                                                                     | Age: Mean (SD)<br><br>Percent Female<br><br>Percent Non-<br>White                                                                                                                                                                    |
|--------------------------------------------------------------------------------------------------------------|------------------------------------------------------------------|----------------------------------------------------------------------------------------------------------------------------------------------------------------------------------------------------------------------------------------------------------------------------------------------------------------------------------------------------------------------------|-------------------------------------------------------------------------------------------------------------------------------------------------------------------------------------------------------------------------|-------------------------------------------------------------------------------------------------------------------------------------------------------------------------------------------------------------------------------------------------------------------------------------------|--------------------------------------------------------------------------------------------------------------------------------------------------------------------------------------------------------------------------------------|
|                                                                                                              |                                                                  |                                                                                                                                                                                                                                                                                                                                                                            |                                                                                                                                                                                                                         | Delusional disorder<br>G1: 15<br>G2: 27<br>G3: 14<br>G4: 7                                                                                                                                                                                                                                |                                                                                                                                                                                                                                      |
|                                                                                                              |                                                                  |                                                                                                                                                                                                                                                                                                                                                                            |                                                                                                                                                                                                                         | Bipolar I disorder<br>G1: 0<br>G2: 21<br>G3: 9<br>G4: 11                                                                                                                                                                                                                                  |                                                                                                                                                                                                                                      |
| Volavka et al., 2004 <sup>17, 18</sup><br>RCT, Medium<br>State psychiatric<br>hospitals,<br>United States    | 157<br>14 weeks                                                  | G1: Clozapine, oral 500<br>mg/day (n=40)<br>G2: Olanzapine, oral 20<br>mg/day (n=39)<br>G3: Risperidone, oral 8<br>mg/day (n=41)<br>G4: Haloperidol, oral 20<br>mg/day (n=37)                                                                                                                                                                                              | Treatment-resistant<br>inpatients diagnosed with<br>chronic schizophrenia or<br>schizoaffective disorder                                                                                                                | Schizophrenia: 86<br>Schizoaffective disorder:<br>14                                                                                                                                                                                                                                      | Age: 40.8 (9.2)                                                                                                                                                                                                                      |
| Wilhelm et al., 2008 <sup>19</sup><br>NRCT, High<br>Psychiatric or forensic<br>hospitals (n=102),<br>Germany | 558<br>6 days <sup>g</sup>                                       | G1: Olanzapine, oral<br>dose NR <sup>h</sup> (n=390)<br>G2: Non-olanzapine<br>medication, oral dose<br>NR <sup>h</sup> (n=168)<br>G3: Risperidone, oral<br>dose NR <sup>h</sup> (n=72)<br>G4: Non-risperidone<br>medication, oral dose<br>NR <sup>h</sup> (n=486)<br>G5: Haloperidol, oral<br>dose NR <sup>h</sup> (n=132)<br>G6: Non-haloperidol<br>medication, oral dose | Inpatients newly admitted<br>to a psychiatric (98%) or<br>forensic hospital (2%) with<br>psychiatric disorders who<br>presented with agitation<br>with or without aggression<br>and required antipsychotic<br>treatment | Primary psychiatric<br>diagnoses <sup>i</sup><br>Schizophrenia spectrum<br>disorders<br>Overall: 59.1<br>G1: 55.1 vs. G2: 68.5<br>G3: 69.4 vs. G4: 57.6<br>G5: 69.7 vs. G6: 55.9<br><br>Substance use disorders<br>G1: 17.7 vs. G2: 17.3<br>G3: 9.7 vs. G4: 18.7<br>G5: 17.4 vs. G6: 17.6 | Age, median<br>(range)<br>Overall: 38 (18 to<br>93)<br>G1: 37 (18 to 93)<br>G2: 39 (19 to 84)<br>G3: 40 (19 to 87)<br>G4: 38 (18 to 93)<br>G5: 39 (18 to 93)<br>G6: 38 (18 to 90)<br><br>Percent female<br>Overall: 36.7<br>G1: 39.2 |

| Author, Year<br>Study Design, Risk of<br>Bias<br>Clinical Setting,<br>Country | N of Patients <sup>a</sup><br><br>Duration of<br>Intervention(s) | Intervention(s) and<br>Comparator(s) (n of<br>patients, if reported) | Summary Description of<br>Patient Population | Percent with Psychiatric<br>Diagnoses                                                                                                      | Age: Mean (SD)<br><br>Percent Female<br><br>Percent Non-<br>White |
|-------------------------------------------------------------------------------|------------------------------------------------------------------|----------------------------------------------------------------------|----------------------------------------------|--------------------------------------------------------------------------------------------------------------------------------------------|-------------------------------------------------------------------|
|                                                                               |                                                                  | NR <sup>h</sup> (n=426)                                              |                                              | Mood (affective) disorders<br>G1: 20.5 vs. G2: 4.8<br>G3: 5.6 vs. G4: 17.3<br>G5: 11.4 vs. G6: 17.1                                        | G2: 31.0<br>G3: 36.1<br>G4: 36.8<br>G5: 29.5<br>G6: 39.0          |
|                                                                               |                                                                  |                                                                      |                                              | Adult personality and<br>behavior disorders<br>G1: 17.2 vs. G2: 10.1<br>G3: 13.9 vs. G4: 15.2<br>G5: 3.0 vs. G6: 18.8                      | Percent non-<br>white: NR                                         |
|                                                                               |                                                                  |                                                                      |                                              | Organic disorders,<br>including symptomatic<br>mental disorders<br>G1: 10.0 vs. G2: 17.9<br>G3: 19.4 vs. G4: 11.3<br>G5: 14.4 vs. G6: 11.7 |                                                                   |
|                                                                               |                                                                  |                                                                      |                                              | Other disorders <sup>j</sup><br>G1: 11.0 vs. G2: 8.3<br>G3: 11.1 vs. G4: 10.1<br>G5: 3.8 vs. G6: 12.2                                      |                                                                   |

<sup>a</sup> The number of patients reflects the entire study from baseline through post-intervention or longer-term followup.

<sup>b</sup> Average of 92 patients discharged per month in each unit, meaning about 184 patients were included in the study each month.<sup>2</sup>

<sup>c</sup> The two study units specialized in caring for people with a primary diagnosis of mental illness who had returned to the hospital within 1 year of a prior discharge.<sup>2</sup>

<sup>d</sup> Neither the baseline nor intervention period count includes patients admitted to the five units that preferred to introduce the study protocol of structured risk assessment without randomization.<sup>3</sup>

<sup>e</sup> Each arm accounted for approximately 1,000 patient-days per month.

<sup>f</sup> Dosages of study drugs were selected based on patients' weight, which was visually estimated by the treating clinician.<sup>15</sup>

<sup>g</sup> The study followed enrolled patients over the first 6 days of their hospitalizations. Baseline was day 1, and the following 5 days (days 2-6) represented the follow-up period.<sup>19</sup>

<sup>h</sup> Patients' antipsychotic treatment was categorized as including any olanzapine or not, including any risperidone or not, and including any haloperidol or not. The three cohorts thus overlap, because each cohort included all patients who received the respective drug in any amount and at any time throughout the 5-day study period.<sup>19</sup>

<sup>i</sup> Patients may have received more than one diagnosis or experienced more than one behavioral disturbance.<sup>19</sup>

<sup>j</sup> Behavioral and emotional disorders with onset usually occurring in childhood and adolescence; behavioral syndromes associated with physiological disturbances and physical factors; neurotic, stress-related and somatoform disorders; and mental retardation.<sup>19</sup>

BPRS = Brief Psychiatric Rating Scale; BVC = Brøset Violence Checklist; CI = confidence interval; CRT = cluster randomized trial; G = group; i.m. = intramuscular; i.v. = intravenous; kg = kilogram; mg = milligram; mins = minutes; n or N = number; NOS = not otherwise specified; NR = not reported; NRCT = nonrandomized controlled trial; NS = not significant;

PTSD = post-traumatic stress disorder; RCT = randomized controlled trial; SD = standard deviation; SDAS = Social Dysfunction and Aggression Scale; U.S. = United States; vs. = versus.

## References

1. Kontio R, Pitkanen A, Joffe G, et al.: eLearning course may shorten the duration of mechanical restraint among psychiatric inpatients: a cluster-randomized trial. *Nord J Psychiatry* 68:443-449, 2014.
2. Smoot SL, Gonzales JL: Cost-effective communication skills training for state hospital employees. *Psychiatric Services* 46:819-822, 1995.
3. Abderhalden C, Needham I, Dassen T, et al.: Structured risk assessment and violence in acute psychiatric wards: randomised controlled trial. *British Journal of Psychiatry* 193:44-50, 2008.
4. van de Sande R, Nijman HL, Noorthoorn EO, et al.: Aggression and seclusion on acute psychiatric wards: effect of short-term risk assessment. *British Journal of Psychiatry* 199:473-478, 2011.
5. Putkonen A, Kuivalainen S, Louheranta O, et al.: Cluster-randomized controlled trial of reducing seclusion and restraint in secured care of men with schizophrenia. *Psychiatric Services* 64:850-855, 2013.
6. Nurenberg JR, Schleifer SJ, Shaffer TM, et al.: Animal-assisted therapy with chronic psychiatric inpatients: equine-assisted psychotherapy and aggressive behavior. *Psychiatric Services* 66:80-86, 2015.
7. Carlson JM, Holm MB: Effectiveness of occupational therapy for reducing restraint use in a psychiatric setting. *American Journal of Occupational Therapy* 47:885-889, 1993.
8. Bieniek SA, Ownby RL, Penalver A, et al.: A double-blind study of lorazepam versus the combination of haloperidol and lorazepam in managing agitation. *Pharmacotherapy* 18:57-62, 1998.
9. Dorevitch A, Katz N, Zemishlany Z, et al.: Intramuscular flunitrazepam versus intramuscular haloperidol in the emergency treatment of aggressive psychotic behavior. *American Journal of Psychiatry* 156:142-144, 1999.
10. Georgieva I, Mulder CL, Noorthoorn E: Reducing seclusion through involuntary medication: a randomized clinical trial. *Psychiatry Research* 205:48-53, 2013.
11. Isbister GK, Calver LA, Page CB, et al.: Randomized controlled trial of intramuscular droperidol versus midazolam for violence and acute behavioral disturbance: the DORM study. *Annals of Emergency Medicine* 56:392-401 e391, 2010.
12. Krakowski MI, Czobor P, Citrome L, et al.: Atypical antipsychotic agents in the treatment of violent patients with schizophrenia and schizoaffective disorder. *Archives of General Psychiatry* 63:622-629, 2006.
13. Krakowski MI, Czobor P, Nolan KA: Atypical antipsychotics, neurocognitive deficits, and aggression in schizophrenic patients. *Journal of Clinical Psychopharmacology* 28:485-493, 2008.
14. Michaud CJ, Thomas WL, McAllen KJ: Early pharmacological treatment of delirium may reduce physical restraint use: a retrospective study. *Annals of Pharmacotherapy* 48:328-334, 2014.
15. Richards JR, Derlet RW, Duncan DR: Chemical restraint for the agitated patient in the emergency department: lorazepam versus droperidol. *Journal of Emergency Medicine* 16:567-573, 1998.
16. Villari V, Rocca P, Fonzo V, et al.: Oral risperidone, olanzapine and quetiapine versus haloperidol in psychotic agitation. *Progress in Neuro-Psychopharmacology and Biological Psychiatry* 32:405-413, 2008.
17. Volavka J, Czobor P, Nolan K, et al.: Overt aggression and psychotic symptoms in patients with schizophrenia treated with clozapine, olanzapine, risperidone, or haloperidol. *Journal of Clinical Psychopharmacology* 24:225-228, 2004.

18. Volavka J, Czobor P, Sheitman B, et al.: Clozapine, olanzapine, risperidone, and haloperidol in the treatment of patients with chronic schizophrenia and schizoaffective disorder. *American Journal of Psychiatry* 159:255-262, 2002.
19. Wilhelm S, Schacht A, Wagner T: Use of antipsychotics and benzodiazepines in patients with psychiatric emergencies: results of an observational trial. *BMC Psychiatry* 8:61, 2008.





**Online Supplement Table 3. Risk of bias assessments for RCTs, part 1 (continued)**

| Author, Year<br>Trial Name (if<br>applicable) | Type of<br>Randomization | Eligibility<br>criteria<br>clearly<br>described?    | Method of<br>randomization<br>method<br>appropriate? | Allocation<br>concealment<br>adequate? | Patients blind<br>to treatment<br>assignment | Outcome<br>assessors<br>blind to txmt<br>assignment?                                                                                                                                   | Care<br>providers<br>blind to txmt<br>assignment? | Any<br>variation<br>from study<br>protocol? | Groups<br>recruited over<br>same time<br>period? |
|-----------------------------------------------|--------------------------|-----------------------------------------------------|------------------------------------------------------|----------------------------------------|----------------------------------------------|----------------------------------------------------------------------------------------------------------------------------------------------------------------------------------------|---------------------------------------------------|---------------------------------------------|--------------------------------------------------|
| Nurenberg et<br>al., 2015 <sup>11</sup>       | Parallel                 | Yes                                                 | Unclear                                              | Unclear                                | No                                           | Yes (violent<br>and nonviolent<br>incidents,<br>seclusion and<br>restraint use,<br>OAS scores,<br>psychiatric<br>symptom<br>scales)<br><br>No (staff<br>expectation of<br>AAT benefit) | No                                                | Unclear                                     | Unclear                                          |
| Putkonen et al.,<br>2013 <sup>12</sup>        | Cluster                  | Yes                                                 | Unclear                                              | No Data                                | No                                           | Unclear                                                                                                                                                                                | No                                                | No Data                                     | Yes                                              |
| Richards et al.,<br>1998 <sup>13</sup>        | Parallel                 | Yes                                                 | Unclear                                              | Yes                                    | NR                                           | No                                                                                                                                                                                     | No                                                | NR                                          | Unclear                                          |
| Smoot et al.,<br>1997 <sup>14</sup>           | Cluster                  | Partially<br>(criteria for<br>unit selection<br>NR) | No                                                   | NA                                     | NA                                           | NA                                                                                                                                                                                     | No                                                | NR                                          | Yes                                              |
| van de Sande<br>et al., 2011 <sup>15</sup>    | Cluster                  | Yes                                                 | Yes                                                  | Yes                                    | Unclear                                      | No                                                                                                                                                                                     | No                                                | No                                          | Yes                                              |
| Volavka et al.,<br>2004 <sup>16</sup>         | Parallel                 | Yes                                                 | Unclear                                              | Unclear                                | Yes                                          | Yes                                                                                                                                                                                    | Yes                                               | No                                          | No (see<br>Rationale)                            |
| Volavka et al.,<br>2002 <sup>17</sup>         |                          |                                                     |                                                      |                                        |                                              |                                                                                                                                                                                        |                                                   |                                             |                                                  |
| Czobor et al.,<br>2002 <sup>18</sup>          |                          |                                                     |                                                      |                                        |                                              |                                                                                                                                                                                        |                                                   |                                             |                                                  |

AAT = animal-assisted therapy; NA = not applicable; NR = not reported; OAS = Overt Aggression Scale; txmt = treatment

**Online Supplement Table 4. Risk of bias assessments for RCTs, part 2**

| Author, Year                                                               | Baseline chx similar?<br>If not similar, did design or analyses account for this?                                                       | Interventions adequately described? | Intervention fidelity adequate? | Cross-overs or contamination raising concern for bias? | KQ 1 Primary Outcomes: Valid and reliable measures consistently used for all participants? | KQ 1 Secondary Outcomes: Valid and reliable measures consistently used for all participants?                                                                    | KQ 1: Benefits outcome data clearly reported without discrepancies?                                        |
|----------------------------------------------------------------------------|-----------------------------------------------------------------------------------------------------------------------------------------|-------------------------------------|---------------------------------|--------------------------------------------------------|--------------------------------------------------------------------------------------------|-----------------------------------------------------------------------------------------------------------------------------------------------------------------|------------------------------------------------------------------------------------------------------------|
| Abderhalden et al., 2008 <sup>1</sup>                                      | No, and design/analyses did not account for differences                                                                                 | Yes                                 | No                              | Unclear                                                | Yes                                                                                        | Yes                                                                                                                                                             | Yes                                                                                                        |
| Bieniek et al., 1998 <sup>2</sup>                                          | Yes, similar characteristics                                                                                                            | Yes                                 | Yes                             | No                                                     | Yes                                                                                        | No (non-validated VAS)                                                                                                                                          | Yes                                                                                                        |
| Dorevitch et al., 2008 <sup>3</sup>                                        | Unclear                                                                                                                                 | Yes                                 | Yes                             | No                                                     | Yes                                                                                        | NA                                                                                                                                                              | Yes                                                                                                        |
| Georgieva et al., 2013 <sup>4</sup>                                        | Yes, similar characteristics                                                                                                            | Yes                                 | Unclear                         | Unclear                                                | Yes                                                                                        | Yes                                                                                                                                                             | Yes                                                                                                        |
| Isbister et al., 2010 <sup>5</sup>                                         | No, and design/analyses did not account for differences                                                                                 | Yes                                 | Unclear                         | No                                                     | Yes                                                                                        | Yes                                                                                                                                                             | Yes                                                                                                        |
| Kontio et al., 2014 <sup>6</sup><br>(also contains link to study protocol) | No for patients; Unclear for staff;                                                                                                     | Yes                                 | Unclear                         | No                                                     | Yes                                                                                        | NA (secondary outcomes only reported for original 12 enrolled units, not for 10 remaining units in assessment of rates and duration of seclusion and restraint) | Partially (error in Kontio et al., 2014, Table 2's baseline min and max seclusion rates for control wards) |
| Kontio et al., 2011 <sup>7</sup>                                           | No for both patients and staff<br><br>Wards not stratified by function, diagnostic profile, average length of stay, or other parameters |                                     |                                 |                                                        |                                                                                            |                                                                                                                                                                 |                                                                                                            |
| Krakowski et al., 2006 <sup>8</sup>                                        | Yes                                                                                                                                     | Yes                                 | Unclear                         | No                                                     | Yes                                                                                        | Yes                                                                                                                                                             | Yes                                                                                                        |
| Krakowski et al., 2008 <sup>9</sup>                                        |                                                                                                                                         |                                     |                                 |                                                        |                                                                                            |                                                                                                                                                                 |                                                                                                            |
| Krakowski et al., 2009 <sup>10</sup>                                       |                                                                                                                                         |                                     |                                 |                                                        |                                                                                            |                                                                                                                                                                 |                                                                                                            |
| Nurenberg et al., 2015 <sup>11</sup>                                       | Partially (higher OAS-M aggression and life skills dysfunction in                                                                       | Yes                                 | Unclear                         | No                                                     | Yes (frequency of aggressive behavior)                                                     | Yes                                                                                                                                                             | Yes                                                                                                        |

**Online Supplement Table 4. Risk of bias assessments for RCTs, part 2 (continued)**

| Author, Year                            | Baseline chx similar?<br>If not similar, did design or analyses account for this?                       | Interventions adequately described? | Intervention fidelity adequate? | Cross-overs or contamination raising concern for bias? | KQ 1 Primary Outcomes: Valid and reliable measures consistently used for all participants? | KQ 1 Secondary Outcomes: Valid and reliable measures consistently used for all participants? | KQ 1: Benefits outcome data clearly reported without discrepancies? |
|-----------------------------------------|---------------------------------------------------------------------------------------------------------|-------------------------------------|---------------------------------|--------------------------------------------------------|--------------------------------------------------------------------------------------------|----------------------------------------------------------------------------------------------|---------------------------------------------------------------------|
| Nurenberg et al., 2015 <sup>11</sup>    | Partially (covariance analyses for life skills dysfunction, but not OAS-M aggression)                   |                                     |                                 |                                                        | No (OAS-M verbal and physical aggression scores)                                           |                                                                                              |                                                                     |
| Putkonen et al., 2013 <sup>12</sup>     | No data                                                                                                 | Yes                                 | No Data                         | No Data                                                | Yes                                                                                        | NA                                                                                           | Yes                                                                 |
| Richards et al., 1998 <sup>13</sup>     | Yes, similar characteristics                                                                            | Yes                                 | NR                              | No                                                     | Unclear (consistent use)                                                                   | NA                                                                                           | Yes                                                                 |
| Smoot et al., 1997 <sup>14</sup>        | Partially (demographic and clinical chx unaccounted for), and No (baseline levels of assaults on staff) | Yes                                 | No                              | No                                                     | Yes                                                                                        | Yes                                                                                          | Yes                                                                 |
| van de Sande et al., 2011 <sup>15</sup> | No, but design/analyses accounted for differences                                                       | Yes                                 | Unclear                         | Yes                                                    | Yes                                                                                        | Yes                                                                                          | Yes                                                                 |
| Volavka et al., 2004 <sup>16</sup>      | Yes                                                                                                     | Yes                                 | Unclear                         | No                                                     | Yes                                                                                        | Yes                                                                                          | Yes                                                                 |
| Volavka et al., 2002 <sup>17</sup>      |                                                                                                         |                                     |                                 |                                                        |                                                                                            |                                                                                              |                                                                     |
| Czobor et al., 2002 <sup>18</sup>       |                                                                                                         |                                     |                                 |                                                        |                                                                                            |                                                                                              |                                                                     |

CAP = canine-assisted psychotherapy; chx = characteristics; EAP = equine-assisted psychotherapy; KQ = Key Question; NA = not applicable; NR = not reported; OAS-M = Overt Aggression Scale-Modified for Outpatient; VAS = visual analogue scale.

**Online Supplement Table 5. Risk of bias assessments for RCTs, part 3**

| Author, Year                                                            | KQ 2 Harms: Valid and reliable measures consistently used for all participants? | KQ 2: Harms outcome data clearly reported without discrepancies? | Important outcomes pre-specified? If yes, reported? | Overall attrition?                                                                                                                         | Differential attrition?                                                                                                                                                                   | Differential ( $\geq 15\%$ ) or overall high attrition (generally $\geq 20\%$ ) raising concern for bias?  |
|-------------------------------------------------------------------------|---------------------------------------------------------------------------------|------------------------------------------------------------------|-----------------------------------------------------|--------------------------------------------------------------------------------------------------------------------------------------------|-------------------------------------------------------------------------------------------------------------------------------------------------------------------------------------------|------------------------------------------------------------------------------------------------------------|
| Abderhalden et al., 2008 <sup>1</sup>                                   | NA                                                                              | NA                                                               | Yes                                                 | 0%                                                                                                                                         | 0%                                                                                                                                                                                        | No                                                                                                         |
| Bieniek et al., 1998 <sup>2</sup>                                       | NA                                                                              | NA                                                               | Yes                                                 | 0%                                                                                                                                         | 0%                                                                                                                                                                                        | No                                                                                                         |
| Dorevitch et al., 2008 <sup>3</sup>                                     | NA                                                                              | NA                                                               | Yes                                                 | 0%                                                                                                                                         | 0%                                                                                                                                                                                        | No                                                                                                         |
| Georgieva et al., 2013 <sup>4</sup>                                     | NA                                                                              | NA                                                               | Yes                                                 | 0%                                                                                                                                         | 0%                                                                                                                                                                                        | No                                                                                                         |
| Isbister et al., 2010 <sup>5</sup>                                      | Yes                                                                             | Yes                                                              | Yes                                                 | 13%                                                                                                                                        | 11.3% (droperidol vs. droperidol plus midazolam); 6.9% (droperidol vs. midazolam); 4.4% (droperidol vs. midazolam)                                                                        | No                                                                                                         |
| Kontio et al., 2014 <sup>6</sup> (also contains link to study protocol) | NA                                                                              | NA                                                               | Yes, yes                                            | Staff training attrition rates based on 12 originally enrolled units (see Kontio et al., 2011):<br>Overall for all randomized staff: 39.9% | Staff training attrition rates based on 12 originally enrolled units (see Kontio et al., 2011):<br>15.6% for all randomized staff<br>34.3% for all staff completing baseline surveys only | Yes for staff training attrition in 12 original units; Unclear in 10 final units (see Kontio et al., 2014) |
| Kontio et al., 2011 <sup>7</sup>                                        |                                                                                 |                                                                  |                                                     | Overall for staff completing baseline completers only: 43.1%                                                                               | Unclear in 10 final units (see Kontio et al., 2014)                                                                                                                                       |                                                                                                            |
|                                                                         |                                                                                 |                                                                  |                                                     | Training completion for all randomized staff: 12.2%                                                                                        |                                                                                                                                                                                           |                                                                                                            |

Training  
completion for

**Online Supplement Table 5. Risk of bias assessments for RCTs, part 3 (continued)**

| Author, Year                                                            | KQ 2 Harms: Valid and reliable measures consistently used for all participants? | KQ 2: Harms outcome data clearly reported without discrepancies?                         | Important outcomes pre-specified? If yes, reported?   | Overall attrition?                                                                | Differential attrition?           | Differential ( $\geq 15\%$ ) or overall high attrition (generally $\geq 20\%$ ) raising concern for bias? |
|-------------------------------------------------------------------------|---------------------------------------------------------------------------------|------------------------------------------------------------------------------------------|-------------------------------------------------------|-----------------------------------------------------------------------------------|-----------------------------------|-----------------------------------------------------------------------------------------------------------|
| Kontio et al., 2014 <sup>6</sup> (also contains link to study protocol) |                                                                                 |                                                                                          |                                                       | staff completing baseline surveys only: 6.5%                                      |                                   |                                                                                                           |
| Kontio et al., 2011 <sup>7</sup>                                        |                                                                                 |                                                                                          |                                                       | Unclear in 10 final units (see Kontio et al., 2014)                               |                                   |                                                                                                           |
| Krakowski et al., 2006 <sup>8</sup>                                     | Yes                                                                             | Partially (limited information reported about ethnic group differences in harm outcomes) | Yes, yes                                              | 36.4%                                                                             | 5.4% to 14.7%                     | Yes                                                                                                       |
| Krakowski et al., 2008 <sup>9</sup>                                     |                                                                                 |                                                                                          |                                                       |                                                                                   |                                   |                                                                                                           |
| Krakowski et al., 2009 <sup>10</sup>                                    |                                                                                 |                                                                                          |                                                       |                                                                                   |                                   |                                                                                                           |
| Nurenberg et al., 2015 <sup>11</sup>                                    | NA                                                                              | NA                                                                                       | Yes, yes                                              | 7.8%                                                                              | 1.4% to 8.9%                      | No                                                                                                        |
| Putkonen et al., 2013 <sup>12</sup>                                     | Yes                                                                             | Unclear                                                                                  | Yes                                                   | No Data                                                                           | No Data                           | No Data                                                                                                   |
| Richards et al., 1998 <sup>13</sup>                                     | Partially (vital signs not consistently measured)                               | Yes                                                                                      | Partially (adverse events not related to vital signs) | 8.2% (missing or incomplete data)                                                 | 1.8% (missing or incomplete data) | No                                                                                                        |
| Smoot et al., 1997 <sup>14</sup>                                        | Yes                                                                             | Yes                                                                                      | Yes                                                   | 9.7% (pre- and post-testing); 46% of experimental group did not complete training | 3.3% (pre- and post-testing)      | Yes                                                                                                       |
| van de Sande et al., 2011 <sup>15</sup>                                 | NA                                                                              | NA                                                                                       | Yes                                                   | 0%                                                                                | 0%                                | No                                                                                                        |
| Volavka et al., 2004 <sup>16</sup>                                      | Yes                                                                             | Yes                                                                                      | Yes, yes                                              | 42%                                                                               | 1.8% to 15.4%                     | Yes                                                                                                       |

---

Volavka et al.,  
2002<sup>17</sup>

---

**Online Supplement Table 5. Risk of bias assessments for RCTs, part 3 (continued)**

| <b>Author, Year</b>                                 | <b>KQ 2 Harms: Valid and reliable measures consistently used for all participants?</b> | <b>KQ 2: Harms outcome data clearly reported without discrepancies?</b> | <b>Important outcomes pre-specified? If yes, reported?</b> | <b>Overall attrition?</b> | <b>Differential attrition?</b> | <b>Differential (<math>\geq 15\%</math>) or overall high attrition (generally <math>\geq 20\%</math>) raising concern for bias?</b> |
|-----------------------------------------------------|----------------------------------------------------------------------------------------|-------------------------------------------------------------------------|------------------------------------------------------------|---------------------------|--------------------------------|-------------------------------------------------------------------------------------------------------------------------------------|
| Czobor et al., 2002 <sup>18</sup> (harms data only) |                                                                                        |                                                                         |                                                            |                           |                                |                                                                                                                                     |

CAP = canine-assisted psychotherapy; EAP = equine-assisted psychotherapy; KQ = Key Question; NA = not applicable; SSP = environmentally enhanced social skills group psychotherapy; vs. = versus

**Online Supplement Table 6. Risk of bias assessments for RCTs, part 4**

| <b>Author, Year</b>                   | <b>Appropriate statistical method for missing data?</b> | <b>If multicenter study, accounted for in analysis?</b> | <b>Potential confounders and modifying variables taken into account in design and/or analysis?</b> | <b>Other potential sources of bias?</b> | <b>ROB</b> | <b>Rationale for ROB Rating</b>                                                                                                                                                                                                                                                                                                                                                                                                                                                                                                                                                                          |
|---------------------------------------|---------------------------------------------------------|---------------------------------------------------------|----------------------------------------------------------------------------------------------------|-----------------------------------------|------------|----------------------------------------------------------------------------------------------------------------------------------------------------------------------------------------------------------------------------------------------------------------------------------------------------------------------------------------------------------------------------------------------------------------------------------------------------------------------------------------------------------------------------------------------------------------------------------------------------------|
| Abderhalden et al., 2008 <sup>1</sup> | Unclear                                                 | NA                                                      | No                                                                                                 | No                                      | Medium     | At baseline, rates of aggression were higher in intervention wards; unclear if interventions were implemented because of risk assessment. Because the unit of randomization was the hospital ward, raters were not blinded to treatment allocation across multiple psychiatric hospitals. There were fewer patients with schizophrenia in the preference group but all other characteristics were similar between groups. There was no reporting of attrition or intervention fidelity. Authors did not describe how wards from multiple hospitals were handled in analyses. No control for confounding. |
| Bieniek et al., 1998 <sup>2</sup>     | NA                                                      | NA                                                      | Yes                                                                                                | No                                      | Low        | No missing data, no attrition, and use of adequate randomization and blinding all strengths of the study. Small sample size (N=20) limited the study's statistical power to evaluate between-group differences, possibly explaining the nonsignificant group-by-time interaction for improvement in OAS scores, despite time to improvement clearly favoring haloperidol + lorazepam. Also unclear which timeframe was used for patient enrollment.                                                                                                                                                      |
| Dorevitch et al., 2008 <sup>3</sup>   | NA                                                      | NA                                                      | No                                                                                                 | No                                      | Medium     | The study was very small (N=28). Unclear whether important sociodemographic variables differed between the two arms (no demographic or other clinical parameters were described); no control of potential confounders between two arms. The authors don't report on treatment fidelity or contamination, but it is unlikely to be a large concern given the study's small size. Authors don't provide info on attrition, but it seems unlikely to be a problem given the population and setting.                                                                                                         |



**Online Supplement Table 6. Risk of bias assessments for RCTs, part 4 (continued)**

| Author, Year                                                            | Appropriate statistical method for missing data? | If multicenter study, accounted for in analysis? | Potential confounders and modifying variables taken into account in design and/or analysis? | Other potential sources of bias? | ROB    | Rationale for ROB Rating                                                                                                                                                                                                                                                                                                                                                                                                                                                                                                                                                                                                                                                                                                                                                                                                               |
|-------------------------------------------------------------------------|--------------------------------------------------|--------------------------------------------------|---------------------------------------------------------------------------------------------|----------------------------------|--------|----------------------------------------------------------------------------------------------------------------------------------------------------------------------------------------------------------------------------------------------------------------------------------------------------------------------------------------------------------------------------------------------------------------------------------------------------------------------------------------------------------------------------------------------------------------------------------------------------------------------------------------------------------------------------------------------------------------------------------------------------------------------------------------------------------------------------------------|
| Georgieva et al., 2013 <sup>4</sup>                                     | NA                                               | NA                                               | No                                                                                          | No                               | High   | The authors did not provide any details about randomization procedures, and clinicians on unit were not clearly blinded from patient assignments to the intervention arm. Data on the use of restrictive measures were extracted from the hospital database, but it is unclear who did the extracting and if s/he was blind to the randomization. Could not collect reliable data on the number of aggressive incidents in each arm. Authors didn't appear to take into account repeated measures, nor did they report results for only first admission, even though 21% of patients were repeat patients. Unclear whether confounders were controlled for; all presented results are unadjusted. Nearly three-quarters of the patients in Group 1 (first-choice involuntary medication) were also secluded, suggesting contamination. |
| Isbister et al., 2010 <sup>5</sup>                                      | Unclear                                          | NA                                               | Yes                                                                                         |                                  | Medium | There were potential confounding variables not addressed in the analysis (e.g., gender). The effect of additional sedation (when needed) in the ITT sample vs. the completers sample receiving only their randomized medication was not described. Unclear how the physical restraints required with medication administration affected outcomes of interest. Unclear how missing data were handled.                                                                                                                                                                                                                                                                                                                                                                                                                                   |
| Kontio et al., 2014 <sup>6</sup> (also contains link to study protocol) | Yes (for seclusion and restraint data)           | Unclear                                          | No                                                                                          | Yes (see Rationale)              | High   | Randomization failed to allocate units in a balanced fashion, resulting in different case mixes among units in each group. This was especially problematic because both units for difficult-to-manage patients received the training intervention. Investigators unable to stratify their analyses of units by function, diagnostic profile, average length of stay, or other parameters to account for this.                                                                                                                                                                                                                                                                                                                                                                                                                          |
| Kontio et al., 2011 <sup>7</sup>                                        |                                                  |                                                  |                                                                                             |                                  |        |                                                                                                                                                                                                                                                                                                                                                                                                                                                                                                                                                                                                                                                                                                                                                                                                                                        |

| Author, Year | Appropriate statistical method for missing data? | If multicenter study, accounted for in analysis? | Potential confounders and modifying variables taken into account in design and/or analysis? | Other potential sources of bias? | ROB | Rationale for ROB Rating                                                                                                                                |
|--------------|--------------------------------------------------|--------------------------------------------------|---------------------------------------------------------------------------------------------|----------------------------------|-----|---------------------------------------------------------------------------------------------------------------------------------------------------------|
|              |                                                  |                                                  |                                                                                             |                                  |     | High overall and differential attrition of staff during the intervention phase (January to November 2009), with greater attrition in the control units' |

**Online Supplement Table 6. Risk of bias assessments for RCTs, part 4 (continued)**

| Author, Year                                                            | Appropriate statistical method for missing data?               | If multicenter study, accounted for in analysis? | Potential confounders and modifying variables taken into account in design and/or analysis? | Other potential sources of bias? | ROB    | Rationale for ROB Rating                                                                                                                                                                                                                                                                                                                                                                                           |
|-------------------------------------------------------------------------|----------------------------------------------------------------|--------------------------------------------------|---------------------------------------------------------------------------------------------|----------------------------------|--------|--------------------------------------------------------------------------------------------------------------------------------------------------------------------------------------------------------------------------------------------------------------------------------------------------------------------------------------------------------------------------------------------------------------------|
| Kontio et al., 2014 <sup>6</sup> (also contains link to study protocol) |                                                                |                                                  |                                                                                             |                                  |        | staff (48% of those randomized and 62% of baseline completers). Kontio et al. (2011) (parent study) describes unexpected improvement in control group's attitudes toward seclusion possibly resulting from this differential attrition, which may have affected seclusion/restraint use outcomes.                                                                                                                  |
| Kontio et al., 2011 <sup>7</sup>                                        |                                                                |                                                  |                                                                                             |                                  |        | Other notable sources of bias include 1) inability to stratify units by potential modifying characteristics and 2) potential impact of seclusion and restraint-focused education-as-usual in some participating control units.                                                                                                                                                                                     |
| Krakowski et al., 2006 <sup>8</sup>                                     | Yes – ITT (see Krakowski et al., 2006, “Statistical Analyses”) | Yes (see Rationale)                              | Yes                                                                                         | No                               | High   | High overall attrition (36.4%) and differential attrition between haloperidol and olanzapine groups (14.7%), and ITT analyses likely not enough to offset the resulting bias. Unclear how ITT findings would differ from completers analysis. Also, potential bias from investigators' decision to pool first and second study sites likely minimal because second site only enrolled 7.3% of sample (8 patients). |
| Krakowski et al., 2008 <sup>9</sup>                                     |                                                                |                                                  |                                                                                             |                                  |        |                                                                                                                                                                                                                                                                                                                                                                                                                    |
| Krakowski et al., 2009 <sup>10</sup>                                    |                                                                |                                                  |                                                                                             |                                  |        | An otherwise well-designed study that took measures to minimize effects of important potential confounders and co-interventions. Strengths included, but were not limited to, double-blinded benefit and harm outcome assessment and medication administration for study drugs and bextropine for EPS.                                                                                                             |
| Nurenberg et                                                            | Unclear                                                        | NA                                               | Partially (see Rationale)                                                                   | Yes (see                         | Medium | Randomized study with low overall and differential                                                                                                                                                                                                                                                                                                                                                                 |

| Author, Year            | Appropriate statistical method for missing data? | If multicenter study, accounted for in analysis? | Potential confounders and modifying variables taken into account in design and/or analysis? | Other potential sources of bias? | ROB | Rationale for ROB Rating                                                                                                                                                                                                                                                                                                                                                                                                                                   |
|-------------------------|--------------------------------------------------|--------------------------------------------------|---------------------------------------------------------------------------------------------|----------------------------------|-----|------------------------------------------------------------------------------------------------------------------------------------------------------------------------------------------------------------------------------------------------------------------------------------------------------------------------------------------------------------------------------------------------------------------------------------------------------------|
| al., 2015 <sup>11</sup> |                                                  |                                                  |                                                                                             | Rationale)                       |     | attrition that took multiple steps to reduce potential confounding from affecting results. Inclusion of active control group helped to control for potential impact of environmental changes on efficacy. Patients and intervention providers not blinded to group assignment, but not feasible given the types of interventions being provided. Issues potentially introducing bias include baseline OAS-M scores not adjusted for in covariance analyses |

**Online Supplement Table 6. Risk of bias assessments for RCTs, part 4 (continued)**

| Author, Year                         | Appropriate statistical method for missing data? | If multicenter study, accounted for in analysis? | Potential confounders and modifying variables taken into account in design and/or analysis? | Other potential sources of bias? | ROB    | Rationale for ROB Rating                                                                                                                                                                                                                                                                                                                                                                                                                                                                                                                                             |
|--------------------------------------|--------------------------------------------------|--------------------------------------------------|---------------------------------------------------------------------------------------------|----------------------------------|--------|----------------------------------------------------------------------------------------------------------------------------------------------------------------------------------------------------------------------------------------------------------------------------------------------------------------------------------------------------------------------------------------------------------------------------------------------------------------------------------------------------------------------------------------------------------------------|
| Nurenberg et al., 2015 <sup>11</sup> |                                                  |                                                  |                                                                                             |                                  |        | (significantly different between EAP and CAP groups), effect of patient expectations on intervention outcomes (not assessed), and inability to match patients in AAT groups with preferred animals.                                                                                                                                                                                                                                                                                                                                                                  |
| Putkonen et al., 2013 <sup>12</sup>  | No Data                                          | NA                                               | Yes                                                                                         | No                               | Medium | To avoid unbalanced comparisons, intervention and control wards were stratified by use of seclusion and restraint. One senior psychiatrist, not associated with the study, made all pharmacological decisions in both wards. The unit of randomization was the hospital ward; as such, there was no blinding of treatment allocation. It was unclear, though probable, that the outcome examiners knew which ward the patient came from (or if the ward had been randomized to 6 Core Strategies) based on health records. There was minimal control of confounding. |
| Richards et al., 1998 <sup>13</sup>  | No                                               | NA                                               | Partially (ethanol intoxication evaluated as confounder, but not physician seniority)       | Yes                              | High   | Potentially biased assessment of sedation (depending on primary clinician's experience), neither outcome assessors nor care providers blinded to treatment assessment, potential impact of uncontrolled intracorrelation within subjects across timepoints because of choice of statistical                                                                                                                                                                                                                                                                          |

| Author, Year                     | Appropriate statistical method for missing data? | If multicenter study, accounted for in analysis? | Potential confounders and modifying variables taken into account in design and/or analysis? | Other potential sources of bias? | ROB  | Rationale for ROB Rating                                                                                                                                                                                                                                                                                                                                                                                                                                                                                   |
|----------------------------------|--------------------------------------------------|--------------------------------------------------|---------------------------------------------------------------------------------------------|----------------------------------|------|------------------------------------------------------------------------------------------------------------------------------------------------------------------------------------------------------------------------------------------------------------------------------------------------------------------------------------------------------------------------------------------------------------------------------------------------------------------------------------------------------------|
|                                  |                                                  |                                                  |                                                                                             |                                  |      | test, and small potential increase in ROB because missing data were excluded without ITT analysis or ensuring no impact from those data.                                                                                                                                                                                                                                                                                                                                                                   |
| Smoot et al., 1997 <sup>14</sup> | NR                                               | NA                                               | No                                                                                          | Yes                              | High | Small CRT involving only two units “randomized” and within the units, only 72 employees. No information about randomization besides use of coin flip. Eligibility criteria not described. Baseline similarity of staff demographics, or patient demographics or clinical characteristics also not described. Approximately 10% of staff refused pre- and post-testing; this probably did not affect the primary outcome of interest. However, almost half of the experimental group failed to complete the |

**Online Supplement Table 6. Risk of bias assessments for RCTs, part 4 (continued)**

| Author, Year                            | Appropriate statistical method for missing data? | If multicenter study, accounted for in analysis? | Potential confounders and modifying variables taken into account in design and/or analysis? | Other potential sources of bias? | ROB    | Rationale for ROB Rating                                                                                                                                                                                                                                                                                                                                                                                                             |
|-----------------------------------------|--------------------------------------------------|--------------------------------------------------|---------------------------------------------------------------------------------------------|----------------------------------|--------|--------------------------------------------------------------------------------------------------------------------------------------------------------------------------------------------------------------------------------------------------------------------------------------------------------------------------------------------------------------------------------------------------------------------------------------|
| Smoot et al., 1997 <sup>14</sup>        |                                                  |                                                  |                                                                                             |                                  |        | intervention training (46% overall, with 40% in day shift and 17% in evening shift), which could potentially be a source of bias. Differences in outcomes could have also varied by shift because of difference in noncompletion rates. No description of how missing data from pre- and post-testing were addressed, nor the extent to which pre- and post-testing non-completers in the experimental group completed the training. |
| van de Sande et al., 2011 <sup>15</sup> | Unclear                                          | NA                                               | Yes                                                                                         | No                               | Medium | There was a risk of rater bias because some nurses who used Crisis Monitor scale as part of intervention also evaluated aggression and seclusion outcomes. The authors state potential risk of contamination, but they make a case that notification of control ward nurses by intervention ward nurses likely did not impact outcome. Analysis controlled for potentially confounding measures.                                     |
| Volavka et al., 2004 <sup>16</sup>      | Yes – ITT(see Volavka et al.,                    | Yes (see Volavka et al., 2002,                   | Yes                                                                                         | Yes (see Rationale)              | High   | High overall attrition (42%) and differential attrition between risperidone and olanzapine groups                                                                                                                                                                                                                                                                                                                                    |

| Author, Year                       | Appropriate statistical method for missing data? | If multicenter study, accounted for in analysis? | Potential confounders and modifying variables taken into account in design and/or analysis? | Other potential sources of bias? | ROB | Rationale for ROB Rating                                                                                                                                                                                                                                                                                                                                                                                                                                                                                                                                                                    |
|------------------------------------|--------------------------------------------------|--------------------------------------------------|---------------------------------------------------------------------------------------------|----------------------------------|-----|---------------------------------------------------------------------------------------------------------------------------------------------------------------------------------------------------------------------------------------------------------------------------------------------------------------------------------------------------------------------------------------------------------------------------------------------------------------------------------------------------------------------------------------------------------------------------------------------|
| Volavka et al., 2002 <sup>17</sup> | 2002, Table 1 and "Measures of Efficacy")        | "Measures of Efficacy")                          |                                                                                             |                                  |     | (15.4%), and LOCF ITT analyses likely not enough to offset the resulting bias. Also, investigators' decision to limit analyses by omitting first 24 days of data likely not made a priori.                                                                                                                                                                                                                                                                                                                                                                                                  |
| Czobor et al., 2002 <sup>18</sup>  |                                                  |                                                  |                                                                                             |                                  |     | <p>Additionally, possible cohort effect following introduction of olanzapine arm 17 months after start of trial (olanzapine arm added in Nov 1997, when evaluation of other arms started in June 1996), but investigators did not find evidence of differences in PANSS scores before vs. after adding this last arm. Unclear if incidence and OAS Total Aggression Severity scores (our primary outcome of interest) were affected.</p> <p>Otherwise, well-designed study that took measures to minimize or eliminate effects of important potential confounders and co-interventions.</p> |

**Online Supplement Table 6. Risk of bias assessments for RCTs, part 4 (continued)**

| Author, Year                       | Appropriate statistical method for missing data? | If multicenter study, accounted for in analysis? | Potential confounders and modifying variables taken into account in design and/or analysis? | Other potential sources of bias? | ROB | Rationale for ROB Rating |
|------------------------------------|--------------------------------------------------|--------------------------------------------------|---------------------------------------------------------------------------------------------|----------------------------------|-----|--------------------------|
| Volavka et al., 2004 <sup>16</sup> |                                                  |                                                  |                                                                                             |                                  |     |                          |
| Volavka et al., 2002 <sup>17</sup> |                                                  |                                                  |                                                                                             |                                  |     |                          |
| Czobor et al., 2002 <sup>18</sup>  |                                                  |                                                  |                                                                                             |                                  |     |                          |

AAT = animal-assisted therapy; CAP = canine-assisted psychotherapy; CRT = cluster randomized trial; EAP = equine-assisted psychotherapy; EPS = extrapyramidal symptoms; ITT = intent-to-treat; LOCF = last observation carried forward; N = number of patients; NA = not applicable; NR = not reported; OAS = Overt Aggression Scale; OAS-M = Overt Aggression Scale-Modified for Outpatient; PANSS = Positive and Negative Syndrome Scale; RCT = randomized controlled trial; ROB = risk of bias; vs. = versus

**Online Supplement Table 7. Risk of bias assessments for observational studies and nonrandomized controlled trials, part 1**

| Author, Year<br>Trial Name (if<br>applicable) | Study<br>Design                | Eligibility<br>criteria<br>clearly<br>described? | Eligibility criteria<br>measured with<br>valid and reliable<br>measures,<br>consistently<br>across all<br>participants? | Strategy for<br>recruiting<br>participants<br>different<br>across<br>groups? | Sample size<br>sufficient to<br>detect<br>meaningfully<br>significant<br>differences?                                            | Interventions<br>adequately<br>described? | Important<br>outcomes<br>pre-<br>specified?<br>If yes,<br>reported? | Comparison<br>group<br>selection<br>appropriate? <sup>a</sup> | Any<br>attempt to<br>balance<br>patient<br>allocation<br>between<br>groups? | Impacts from<br>concurrent<br>interventions or<br>unintended<br>exposures that<br>might bias<br>results ruled<br>out? |
|-----------------------------------------------|--------------------------------|--------------------------------------------------|-------------------------------------------------------------------------------------------------------------------------|------------------------------------------------------------------------------|----------------------------------------------------------------------------------------------------------------------------------|-------------------------------------------|---------------------------------------------------------------------|---------------------------------------------------------------|-----------------------------------------------------------------------------|-----------------------------------------------------------------------------------------------------------------------|
| Carlson et al.,<br>1993 <sup>19</sup>         | Cohort<br>(retro-<br>spective) | Yes                                              | Yes                                                                                                                     | No,<br>retrospective<br>chart review                                         | No Data                                                                                                                          | No                                        | Yes                                                                 | No                                                            | Unclear                                                                     | No                                                                                                                    |
| Michaud et al.,<br>2014 <sup>20</sup>         | Cohort<br>(retro-<br>spective) | Yes                                              | Unclear                                                                                                                 | No                                                                           | Yes                                                                                                                              | No                                        | Yes                                                                 | Yes                                                           | No                                                                          | No                                                                                                                    |
| Villari et al.,<br>2008 <sup>21</sup>         | NRCT                           | Unclear                                          | Unclear                                                                                                                 | No                                                                           | Unclear<br>(powered to<br>detect very<br>small<br>differences,<br>not<br>necessarily<br>clinically<br>meaningful<br>differences) | Yes                                       | Partially<br>(harms not<br>pre-<br>specified)                       | Yes                                                           | Yes                                                                         | Partially (unclear<br>if other<br>medications<br>taken in addition<br>to what patients<br>were assigned)              |
| Wilhelm et al.,<br>2008 <sup>22</sup>         | NRCT                           | Yes                                              | Partially (NR which<br>clinical diagnoses<br>deemed eligible)                                                           | No                                                                           | Yes                                                                                                                              | Partially<br>(antipsychotic<br>dosing NR) | Yes                                                                 | Yes                                                           | No                                                                          | No                                                                                                                    |

<sup>a</sup> After taking into account feasibility and ethical considerations.

NR = not reported; NRCT = nonrandomized controlled trial.

**Online Supplement Table 8. Risk of bias assessments for observational studies and nonrandomized controlled trials, part 2**

| Author, Year<br>Trial Name (if<br>applicable) | Study<br>Design                | Outcome<br>assessors<br>blind to txmt<br>or exposure<br>status? | Interventions/exposures<br>assessed using valid and<br>reliable measures,<br>consistently across all<br>participants? | Follow-up length<br>sufficient to<br>support<br>benefits/harms<br>evaluation? | Overall<br>attrition?                                                                      | Differential attrition? | Differential ( $\geq 15\%$ ) or<br>overall high attrition<br>(generally $\geq 20\%$ )<br>raising concern for<br>bias? |
|-----------------------------------------------|--------------------------------|-----------------------------------------------------------------|-----------------------------------------------------------------------------------------------------------------------|-------------------------------------------------------------------------------|--------------------------------------------------------------------------------------------|-------------------------|-----------------------------------------------------------------------------------------------------------------------|
| Carlson et al.,<br>1993 <sup>19</sup>         | Cohort<br>(retro-<br>spective) | No                                                              | No (dependent on accuracy<br>of chart documentation)                                                                  | Yes (90 days)                                                                 | NA (charts<br>selected for<br>study based<br>solely on<br>meeting<br>eligibility criteria) | NA                      | NA                                                                                                                    |
| Michaud et al.,<br>2014 <sup>20</sup>         | Cohort<br>(retro-<br>spective) | No                                                              | Unclear                                                                                                               | Yes                                                                           | 0%                                                                                         | 0%                      | No                                                                                                                    |
| Villari et al.,<br>2008 <sup>21</sup>         | NRCT                           | Yes                                                             | Partially (dosing distribution<br>NR)                                                                                 | Yes (benefits), and<br>Partially (harms)                                      | 9.9%                                                                                       | 0.8% to 2.8%            | No                                                                                                                    |
| Wilhelm et al.,<br>2008 <sup>22</sup>         | NRCT                           | NR                                                              | Unclear                                                                                                               | Yes                                                                           | 2.9%                                                                                       | 0.2% to 2.2%            | No                                                                                                                    |

NR = not reported; NRCT = nonrandomized controlled trial; txmt = treatment

**Online Supplement Table 9. Risk of bias assessments for observational studies and nonrandomized controlled trials, part 3**

| Author, Year<br>Trial Name (if<br>applicable) | Study Design | Confounding and/or<br>effect modifying<br>variables assessed<br>using valid and reliable<br>measures, consistently<br>across all participants? | KQ 1: Appropriate<br>statistical methods<br>used for assessing<br>primary benefit<br>outcomes? | KQ 2: Appropriate<br>statistical<br>methods used for<br>assessing harms<br>outcomes? | Any impt<br>information<br>about primary<br>outcomes<br>missing? | ROB | Rationale for ROB Rating |
|-----------------------------------------------|--------------|------------------------------------------------------------------------------------------------------------------------------------------------|------------------------------------------------------------------------------------------------|--------------------------------------------------------------------------------------|------------------------------------------------------------------|-----|--------------------------|
|-----------------------------------------------|--------------|------------------------------------------------------------------------------------------------------------------------------------------------|------------------------------------------------------------------------------------------------|--------------------------------------------------------------------------------------|------------------------------------------------------------------|-----|--------------------------|

| Author, Year<br>Trial Name (if<br>applicable) | Study Design                | Confounding and/or<br>effect modifying<br>variables assessed<br>using valid and reliable<br>measures, consistently<br>across all participants? | KQ 1: Appropriate<br>statistical methods<br>used for assessing<br>primary benefit<br>outcomes? | KQ 2: Appropriate<br>statistical<br>methods used for<br>assessing harms<br>outcomes? | Any impt<br>information<br>about primary<br>outcomes<br>missing? | ROB    | Rationale for ROB Rating                                                                                                                                                                                                                                                                                                                                                                                                                                                                                                                                                                                                                                                                        |
|-----------------------------------------------|-----------------------------|------------------------------------------------------------------------------------------------------------------------------------------------|------------------------------------------------------------------------------------------------|--------------------------------------------------------------------------------------|------------------------------------------------------------------|--------|-------------------------------------------------------------------------------------------------------------------------------------------------------------------------------------------------------------------------------------------------------------------------------------------------------------------------------------------------------------------------------------------------------------------------------------------------------------------------------------------------------------------------------------------------------------------------------------------------------------------------------------------------------------------------------------------------|
| Carlson et al.,<br>1993 <sup>19</sup>         | Cohort (retro-<br>spective) | No                                                                                                                                             | Yes                                                                                            | NA                                                                                   | Yes (see<br>Rationale)                                           | High   | High risk of misclassification bias due to inconsistent documentation of occupational therapy (OT) exposure. Intervention applied based on "screening or word of mouth". When identified in charts, frequency and intensity of sessions not consistently described. Minimal distinction between eligibility criteria for OT and no-OT groups. Also, no reporting of extent to which patients' histories of aggression affected outcomes. Readmitted patients functionally excluded from study because "charts were unavailable". Also, no evaluation of frequency of seclusion and restraint episodes.                                                                                          |
| Michaud et al.,<br>2014 <sup>20</sup>         | Cohort<br>(retrospective)   | Unclear                                                                                                                                        | Yes                                                                                            | Yes                                                                                  | No                                                               | High   | Unclear how many patients did not receive screen. Medication dosing is unknown. There was no control for differences in concomitant medication use between arms; no control for confounding in primary analyses. Unclear if/how restraint assessment was consistently applied. Study was powered to detect a 20% difference in primary outcome. There were no major differences between groups except a much higher percentage of hypervigilance documented in the treatment group. More than half of patients with at least 1 positive delirium score were not enrolled (mostly due to lack of mechanical ventilation, some due to missing data), which has the potential to bias the results. |
| Villari et al.,<br>2008 <sup>21</sup>         | NRCT                        | Partially (unclear to what<br>extent medication dosing<br>varied by treating<br>physician)                                                     | Yes                                                                                            | Yes                                                                                  | No                                                               | Medium | Baseline characteristics similar despite alternating assignment to medication groups. Authors accounted for several potential confounders, such as prior depot                                                                                                                                                                                                                                                                                                                                                                                                                                                                                                                                  |



**Online Supplement Table 9. Risk of bias assessments for observational studies and nonrandomized controlled trials, part 3 (continued)**

| Author, Year<br>Trial Name (if<br>applicable) | Study Design | Confounding and/or<br>effect modifying<br>variables assessed<br>using valid and reliable<br>measures, consistently<br>across all participants? | KQ 1: Appropriate<br>statistical methods<br>used for assessing<br>primary benefit<br>outcomes? | KQ 2: Appropriate<br>statistical<br>methods used for<br>assessing harms<br>outcomes? | Any impt<br>information<br>about primary<br>outcomes<br>missing? | ROB  | Rationale for ROB Rating                                                                                                                                                                                                                                                                                                                                                                                                     |
|-----------------------------------------------|--------------|------------------------------------------------------------------------------------------------------------------------------------------------|------------------------------------------------------------------------------------------------|--------------------------------------------------------------------------------------|------------------------------------------------------------------|------|------------------------------------------------------------------------------------------------------------------------------------------------------------------------------------------------------------------------------------------------------------------------------------------------------------------------------------------------------------------------------------------------------------------------------|
| Villari et al.,<br>2008 <sup>21</sup>         |              |                                                                                                                                                |                                                                                                |                                                                                      |                                                                  |      | antipsychotic or ECT treatment, but unable to account for other concurrent treatments that patients might have been taking at time of admission. Doses determined by treating physicians, who might have also introduced bias that way. Open-ended collection of KQ 2 harms data possibly affected by bias and might have led to underreporting. Also unclear if time of individual patients' enrollment introduced any ROB. |
| Wilhelm et al.,<br>2008 <sup>22</sup>         | NRCT         | Partially (benzodiazepine use measured, but unclear how other potential confounders measured)                                                  | Partially (exploratory analyses only, no adjustment for use of multiple centers)               | Partially (exploratory analyses only, no adjustment for use of multiple centers)     | Partially (differences in monotherapy groups NR)                 | High | High risk of selection bias into different medication groups based on clinical indication and variables related to the treating physician. Unadjusted confounding by concomitant and prior medication use. No attempts to adjust statistically for between-hospital differences or patients' baseline demographic or clinical chx.                                                                                           |

chx = characteristics; ECT = electroconvulsive therapy; impt = important; KQ = Key Question; NR = not reported; NRCT = nonrandomized controlled trial; ROB = risk of bias

## References

1. Abderhalden C, Needham I, Dassen T, et al.: Structured risk assessment and violence in acute psychiatric wards: randomised controlled trial. *British Journal of Psychiatry* 193:44-50, 2008.
2. Bieniek SA, Ownby RL, Penalver A, et al.: A double-blind study of lorazepam versus the combination of haloperidol and lorazepam in managing agitation. *Pharmacotherapy* 18:57-62, 1998.
3. Dorevitch A, Katz N, Zemishlany Z, et al.: Intramuscular flunitrazepam versus intramuscular haloperidol in the emergency treatment of aggressive psychotic behavior. *American Journal of Psychiatry* 156:142-144, 1999.
4. Georgieva I, Mulder CL, Noorthoorn E: Reducing seclusion through involuntary medication: a randomized clinical trial. *Psychiatry Research* 205:48-53, 2013.
5. Isbister GK, Calver LA, Page CB, et al.: Randomized controlled trial of intramuscular droperidol versus midazolam for violence and acute behavioral disturbance: the DORM study. *Annals of Emergency Medicine* 56:392-401 e391, 2010.
6. Kontio R, Pitkanen A, Joffe G, et al.: eLearning course may shorten the duration of mechanical restraint among psychiatric inpatients: a cluster-randomized trial. *Nord J Psychiatry* 68:443-449, 2014.
7. Kontio R, Lahti M, Pitkanen A, et al.: Impact of eLearning course on nurses' professional competence in seclusion and restraint practices: a randomized controlled study (ISRCTN32869544). *Journal of Psychiatric and Mental Health Nursing* 18:813-821, 2011.
8. Krakowski MI, Czobor P, Citrome L, et al.: Atypical antipsychotic agents in the treatment of violent patients with schizophrenia and schizoaffective disorder. *Archives of General Psychiatry* 63:622-629, 2006.
9. Krakowski MI, Czobor P, Nolan KA: Atypical antipsychotics, neurocognitive deficits, and aggression in schizophrenic patients. *Journal of Clinical Psychopharmacology* 28:485-493, 2008.
10. Krakowski M, Czobor P, Citrome L: Weight gain, metabolic parameters, and the impact of race in aggressive inpatients randomized to double-blind clozapine, olanzapine or haloperidol. *Schizophrenia Research* 110:95-102, 2009.
11. Nurenberg JR, Schleifer SJ, Shaffer TM, et al.: Animal-assisted therapy with chronic psychiatric inpatients: equine-assisted psychotherapy and aggressive behavior. *Psychiatric Services* 66:80-86, 2015.
12. Putkonen A, Kuivalainen S, Louheranta O, et al.: Cluster-randomized controlled trial of reducing seclusion and restraint in secured care of men with schizophrenia. *Psychiatric Services* 64:850-855, 2013.
13. Richards JR, Derlet RW, Duncan DR: Chemical restraint for the agitated patient in the emergency department: lorazepam versus droperidol. *Journal of Emergency Medicine* 16:567-573, 1998.
14. Smoot SL, Gonzales JL: Cost-effective communication skills training for state hospital employees. *Psychiatric Services* 46:819-822, 1995.
15. van de Sande R, Nijman HL, Noorthoorn EO, et al.: Aggression and seclusion on acute psychiatric wards: effect of short-term risk assessment. *British Journal of Psychiatry* 199:473-478, 2011.
16. Volavka J, Czobor P, Nolan K, et al.: Overt aggression and psychotic symptoms in patients with schizophrenia treated with clozapine, olanzapine, risperidone, or haloperidol. *Journal of Clinical Psychopharmacology* 24:225-228, 2004.
17. Volavka J, Czobor P, Sheitman B, et al.: Clozapine, olanzapine, risperidone, and haloperidol in the treatment of patients with chronic schizophrenia and schizoaffective disorder. *American Journal of Psychiatry* 159:255-262, 2002.

18. Czobor P, Volavka J, Sheitman B, et al.: Antipsychotic-induced weight gain and therapeutic response: a differential association. *Journal of Clinical Psychopharmacology* 22:244-251, 2002.
19. Carlson JM, Holm MB: Effectiveness of occupational therapy for reducing restraint use in a psychiatric setting. *American Journal of Occupational Therapy* 47:885-889, 1993.
20. Michaud CJ, Thomas WL, McAllen KJ: Early pharmacological treatment of delirium may reduce physical restraint use: a retrospective study. *Annals of Pharmacotherapy* 48:328-334, 2014.
21. Villari V, Rocca P, Fonzo V, et al.: Oral risperidone, olanzapine and quetiapine versus haloperidol in psychotic agitation. *Progress in Neuro-Psychopharmacology and Biological Psychiatry* 32:405-413, 2008.
22. Wilhelm S, Schacht A, Wagner T: Use of antipsychotics and benzodiazepines in patients with psychiatric emergencies: results of an observational trial. *BMC Psychiatry* 8:61, 2008.
